# Supplementary material
Source: MDPI journal article supplement (https://www.mdpi.com/2313-4321/8/5/78)
Supplement: s1 [file s1 › recycling-2508595-supplementary.pdf]

# Recycling

## Supporting Information

### Table of Contents

|                                                                                                   |    |
|---------------------------------------------------------------------------------------------------|----|
| 1. Methodology.....                                                                               | 2  |
| 2. Background – Population Size and Distribution, and Land Area.....                              | 2  |
| 3. Battery Use – Battery Electric Vehicles (BEVs) and Battery Energy Storage Systems (BESSs)..... | 3  |
| 4. LIB Supply Chain – From Raw Materials to End-of-Life.....                                      | 7  |
| 5. LIB Supply Chain – Battery Recycling.....                                                      | 10 |
| 6. References .....                                                                               | 11 |

# 1. Methodology

CSIRO and ANL are national laboratories in Australia and the U.S. respectively that have diverse activities in R&D and commercialisation of technologies. Australia and the U.S. have long been collaborating in a variety of science and engineering fields. Both labs engage with a variety of stakeholders in lithium-ion battery recycling and the developing battery value chain. Whilst both countries are progressing in developing LIB recycling and industries in the supply chain, it has become clear that while each country's goals are very similar, varying factors are accelerating and, in some cases, slowing the development of the battery value chain. The purpose of this initial case study is to glean information from various stakeholders on what they see as some of the challenges, opportunities, areas for improvement and areas where collaboration will be critical. The approach presented here could be used by other countries to also consider and compare what has been undertaken within and between the two countries here to better enable them to understand what areas of the battery value chain to focus on and whether it may or may not be viable to establish a LIB recycling facility onshore. Holistically it allows for a broader discussion around global value chains that are rapidly developing, where integration may be a better option than duplication. It will be of interest to revisit this topic in 5- and 10-years' time to see the change that has occurred in both Australia and U.S., and globally as regulations and new requirements (i.e. Battery Passport, ESG etc) come into effect and countries progress developing viable and sustainable battery value chains and LIB recycling.

## 2. Background – Population Size and Distribution, and Land Area

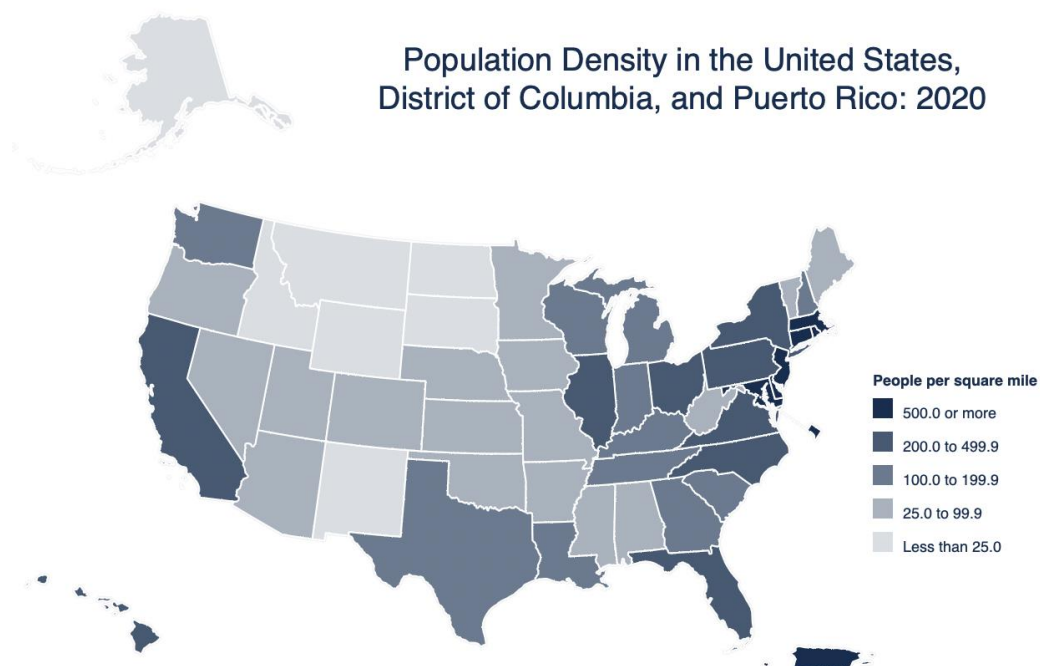

**Figure S1.** Population Density by State in the U.S. (Reproduced from U.S. Census Bureau[1]).

### 3. Battery Use – Battery Electric Vehicles (BEVs) and Battery Energy Storage Systems (BESSs)

In recent years, Australia has seen LIBs become a common topic of discussion around BEVs, but especially in BESS for large scale systems for grid storage to residential storage coupled with rooftop photovoltaics. Unlike the U.S. and other countries, Australia's uptake of BEVs has been slow and is in part constrained by the vast distances and low population densities across the country, with a corresponding sparse road network connecting major cities and regional centers.

Australia's involvement with electrified transport began in the mid-1990s. The Holden ECOMmodore,(2) coupling a General Motors 95kW, 2.0-litre, four-cylinder ICE with a CSIRO developed 50kW electric motor (charged by lead acid batteries backed up by supercapacitors), allowed a full family size car to be produced with the goal of reducing hydrocarbon and greenhouse emissions (**Figure S2**).

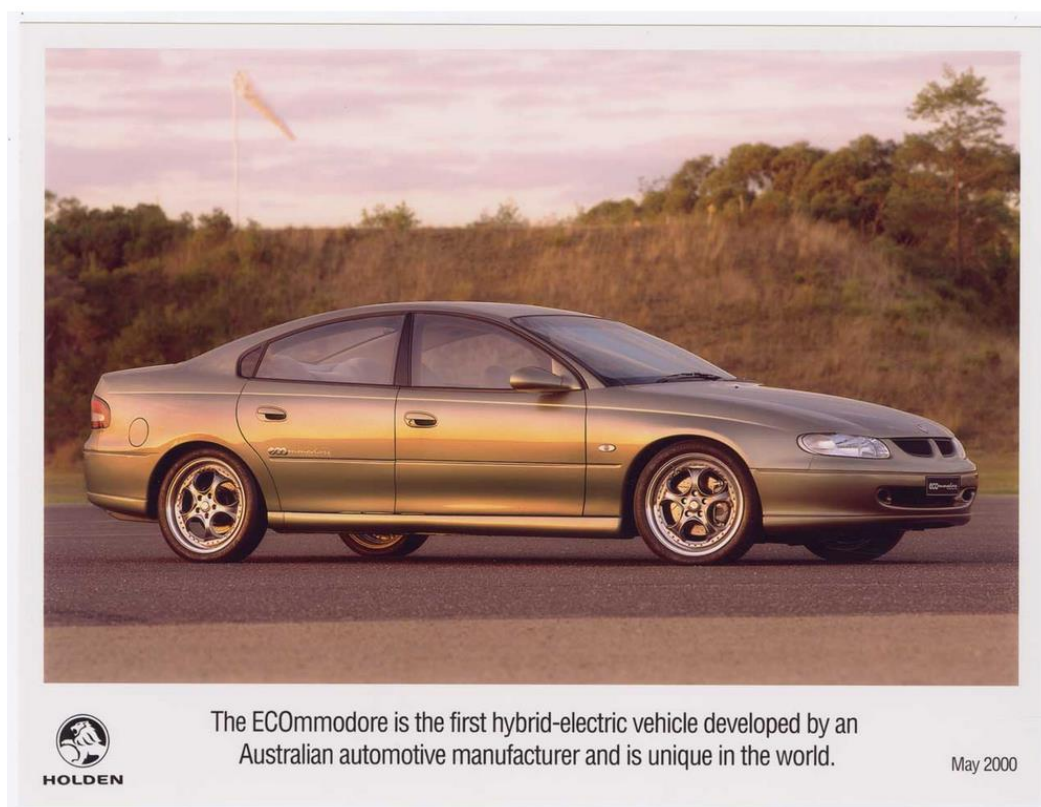

**Figure S2.** Part of ECOMmodore national media launch kit (Reproduced from [2]).

To put this in context, as of 2022 in Australia the progress of uptake of BEV can be summarized by the following points;[3, 4]

- From 2011 to 2022, just over 83000 PHEV and BEVs have been sold in Australia, with signs of strong growth over the last few years (**Figure S3**)
- Currently, as of 2022, there are now 25 different EV models for sale
- All BEVs vehicles are imported (none manufactured or assembled in Australia)
- Of the 15 top-selling BEV models (2022 data), 13 were BEVs, while only 2 were PHEVs. The trend towards BEVs is due to the types of vehicles offered in this class, being primarily small compact cars and SUV types, typically favoured in our densely populated cities
- Towards the end of 2022, reports started to show the introduction of new large SUVs and larger 4WD vehicles, which are commonly used in long distance transportation across Australia. However, new models of diesel and petrol vehicles still dominate the market whilst more PHEVs, rather than full BEVs, are expected to arrive in 2023.[3] This would suggest that concerns remain around fast charging times, infrastructure availability and range anxiety and as to whether BEVs can accommodate the vast, remote, harsh environmental conditions.
- This is substantiated by the small number of public charging locations (2,147) across Australia, with a total of 3,669 individual BEV chargers.

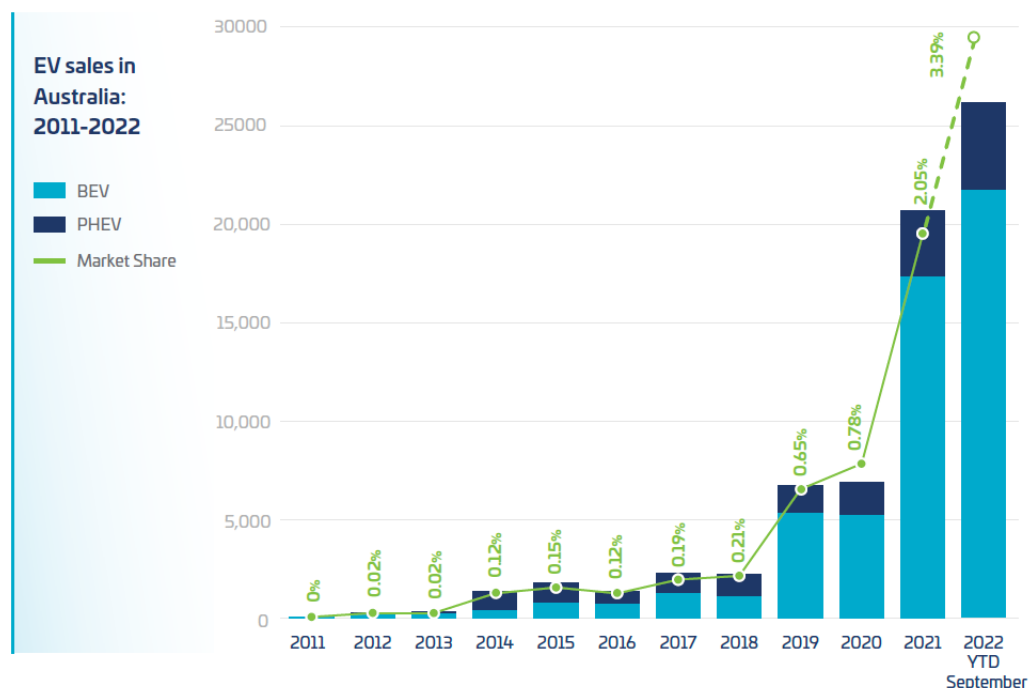

**Figure S3.** BEV and PEV sales in Australia since 2011 (Reproduced from [3]).

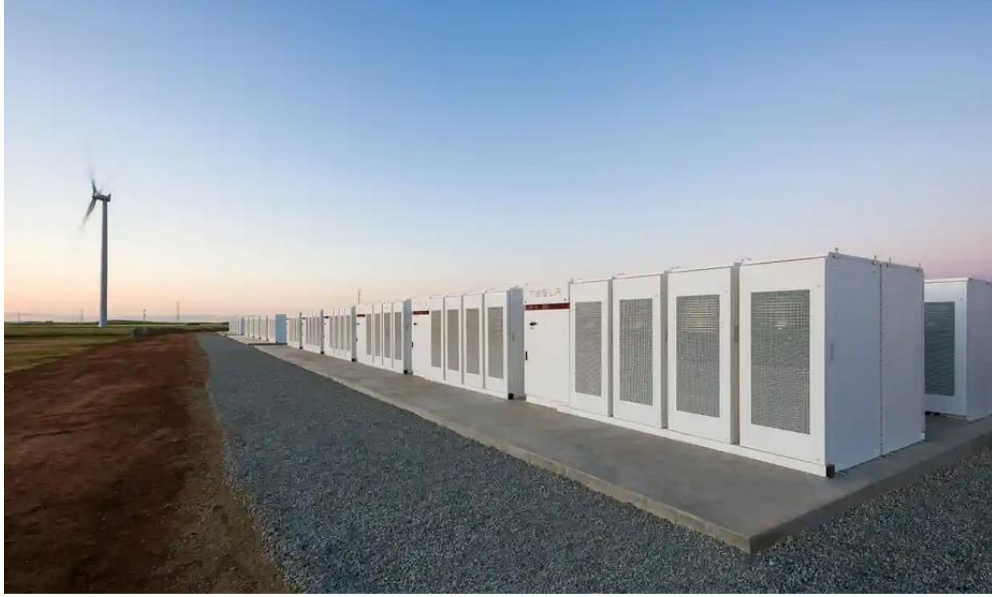

**Figure S4.** The Tesla Powerpacks in Hornsdale, Australia (Reproduced from [5]).

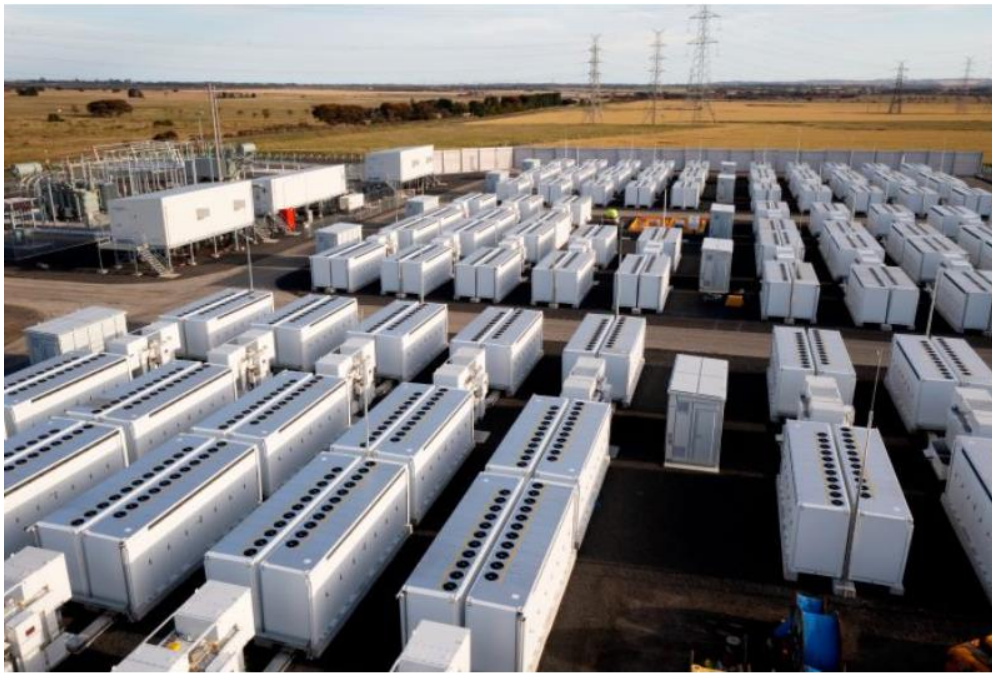

**Figure S5.** The 2021 The Victorian Big Battery in Geelong, Australia.(Reproduced from [6]).

Australia's solar, hydro and wind-based energy accounted for more than 18% of the country's total electricity generation in 2020, and has increased to 32% in 2022.[7, 8] These intermittent energy generation sources need to be coupled to energy storage systems; a critical stage in the transition to a sustainable energy system.[8] The Australia energy storage market expects a compound annual growth rate of greater than 10% during the forecast period of 2022 – 2027. For instance, the Clean Energy Council of Australia, recorded

approximately 23,796 BESS installed units with a combined capacity of 238 MWh in 2020, an increase of 5.19%, compared to the previous year.

**Table S1.** Utility-Scale Battery Systems Under Construction at the End of 2021 (Reproduced from [7]).

| State* | Project                                                      | Owner                           | Locality       | Size           |
|--------|--------------------------------------------------------------|---------------------------------|----------------|----------------|
| SA     | Torrens Island Battery                                       | AGL                             | Torrens Island | 250 MW/250 MWh |
| VIC    | Hazelwood Battery Energy Storage System                      | Engie                           | Hazelwood      | 150 MW/150 MWh |
| ACT    | Capital Battery                                              | Neoen                           | Jerrabomerra   | 100 MW/150 MWh |
| WA     | Perth (Kwinana)                                              | Synergy                         | Kwinana        | 100 MW/200 MWh |
| NSW    | Wallgrove Grid Battery                                       | Transgrid                       | Wallgrove      | 52 MW/78 MWh   |
| NSW    | New England Solar Farm                                       | UPC/AC Renewables               | Uralla         | 50 MW/50 MWh   |
| WA     | Koodaideri Mine Solar Farm                                   | Rio Tinto                       | Newman         | 45 MW/12 MWh   |
| WA     | Pilbara Project Energy Connect Battery Energy Storage System | Fortescue Metals                | Chichester     | 42 MW/13 MWh   |
| NT     | Darwin-Katherine Battery Energy Storage System               | Territory Generation            | Darwin         | 35 MW/20 MWh   |
| VIC    | Bulgana Green Power Hub                                      | Neoen                           | Joel South     | 20 MW/34 MWh   |
| WA     | BHP Leinster Nickel Mine                                     | TransAlta Southern Cross Energy | Mount Keith    | 10 MW/5 MWh    |
| SA     | Adelaide Desalination Plant Solar Farm Stage 1               | SA Water                        | Adelaide       | 6 MW/12 MWh    |
| NT     | Katherine Solar Power Station                                | Eni Australia                   | Cossack        | 6 MW/3 MWh     |
| VIC    | West Gippsland Battery                                       | E22                             | Longwary       | 5 MW/8 MWh     |
| WA     | Gold Fields Gruyere Mine Microgrid                           | APA Group                       | Cosmo Newbery  | 4 MW/4 MWh     |
| NSW    | Narellan Shopping Centre Solar Project                       | CEP Energy                      | Narellan       | 4 MW/10 MWh    |
| VIC    | Mortlake South Wind Farms                                    | ACCIONA                         | Kolora         | 5 MW           |
| QLD    | Black River Substation                                       | Energy Queensland               | Townsville     | 4 MW/8 MWh     |
| QLD    | Tanby Substation                                             | Energy Queensland               | Yeppoon        | 4 MW/8 MWh     |
| QLD    | Bargara Substation                                           | Energy Queensland               | Bundaberg      | 4 MW/8 MWh     |
| QLD    | Torquay Substation                                           | Energy Queensland               | Hervey Bay     | 4 MW/8 MWh     |
| QLD    | Torrington                                                   | Energy Queensland               | Toowoomba      | 4 MW/8 MWh     |
| SA     | Happy Valley Reservoir                                       | SA Water                        | Happy Valley   | 4 MW/10 MWh    |
| VIC    | RayGen Power Plant                                           | RayGen Resources                | Carwarp        | 3 MW/50 MWh    |
| NT     | Jabiru Hybrid Renewable Project                              | EDL                             | Jabiru         | 3 MW/5 MWh     |
| QLD    | Dalby Solar Farm – Stage 1                                   | Fotowatio Renewable Ventures    | Dalby          | 3 MW/5 MWh     |
| QLD    | Kennedy Energy Park                                          | Windlab                         | Hughenden      | 2 MW/4 MWh     |
| WA     | Garden Island Microgrid                                      | Carnegie Clean Energy           | Garden Island  | 2 MW/1 MWh     |
| SA     | Aldinga Wastewater Treatment Plant Reserve                   | SA Water                        | Aldinga        | 1 MW/1 MWh     |

\* SA – South Australia, VIC – Victoria, ACT – Australian Capital Territory, NSW – New South Wales, WA – Western Australia, NT – Northern Territory and QLD - Queensland.

## 4. LIB Supply Chain – From Raw Materials to End-of-Life

**Table S2.** Australia’s critical minerals list, resources, and production with global comparisons (Reproduced from [9]).

| Critical Mineral        | US list <sup>1</sup> | EU list <sup>2</sup> | Japan list <sup>3</sup> | India list <sup>4</sup> | Australian Geological Potential <sup>5</sup> | Australian Economic Demonstrated Resources (2020) <sup>6</sup> | Australia Production (2020) <sup>6</sup> | World Mine Production (2020) <sup>6</sup> |
|-------------------------|----------------------|----------------------|-------------------------|-------------------------|----------------------------------------------|----------------------------------------------------------------|------------------------------------------|-------------------------------------------|
| High-purity alumina     | Yes                  | Yes                  | No                      | No                      | Moderate                                     | No data                                                        | No data                                  | No data                                   |
| Antimony                | Yes                  | Yes                  | Yes                     | Yes                     | Moderate                                     | 125.2 kt                                                       | 3.9 kt                                   | 155 kt                                    |
| Beryllium               | Yes                  | Yes                  | Yes                     | Yes                     | Moderate                                     | No data                                                        | No data                                  | 240 t                                     |
| Bismuth                 | Yes                  | Yes                  | Yes                     | Yes                     | Moderate                                     | No data                                                        | No data                                  | 17 kt                                     |
| Chromium                | Yes                  | No                   | Yes                     | Yes                     | Moderate                                     | 0                                                              | 0                                        | 40,000 kt                                 |
| Cobalt                  | Yes                  | Yes                  | Yes                     | Yes                     | High                                         | 1,495 kt                                                       | 5.6 kt                                   | 135 kt                                    |
| Gallium                 | Yes                  | Yes                  | Yes                     | Yes                     | High                                         | No data                                                        | No data                                  | 300 t                                     |
| Germanium               | Yes                  | Yes                  | Yes                     | Yes                     | High                                         | No data                                                        | No data                                  | 130 t                                     |
| Graphite                | Yes                  | Yes                  | Yes                     | Yes                     | Moderate                                     | 7,970 kt                                                       | 0                                        | 1,100 kt                                  |
| Hafnium                 | Yes                  | Yes                  | Yes                     | No                      | High                                         | 14.5 kt                                                        | No data                                  | No data                                   |
| Helium                  | No                   | No                   | No                      | No                      | Moderate                                     | No data                                                        | 4 hm <sup>3</sup>                        | 140 hm <sup>3</sup>                       |
| Indium                  | Yes                  | Yes                  | Yes                     | Yes                     | Moderate                                     | No data                                                        | No data                                  | 900 t                                     |
| Lithium                 | Yes                  | Yes                  | Yes                     | Yes                     | High                                         | 6,174 kt                                                       | 40 kt                                    | 82 kt                                     |
| Magnesium               | Yes                  | Yes                  | Yes                     | No                      | High                                         | Magnesite: 286,000 kt                                          | Magnesite: 799 kt                        | Magnesite: 26,000 kt                      |
| Manganese               | Yes                  | No                   | Yes                     | No                      | High                                         | Manganese ore: 276,000 kt                                      | Manganese ore: 4,800 kt                  | 17,200 kt                                 |
| Niobium                 | Yes                  | Yes                  | Yes                     | Yes                     | High                                         | 216 kt                                                         | No data                                  | 78 kt                                     |
| Platinum-group elements | Yes                  | Yes                  | Yes                     | Yes                     | Moderate                                     | 107 t                                                          | 0.522 t                                  | 380 t                                     |
| Rare-earth elements     | Yes                  | Yes                  | Yes                     | Yes                     | High                                         | 4,200 kt                                                       | 20 kt                                    | 240 kt                                    |
| Rhenium                 | No                   | No                   | Yes                     | Yes                     | Moderate                                     | No data                                                        | No data                                  | 53 t                                      |
| Scandium                | Yes                  | Yes                  | No                      | No                      | High                                         | 30.34 kt                                                       | No data                                  | No data                                   |
| Silicon                 | No                   | Yes                  | Yes                     | Yes                     | High                                         | No data                                                        | No data                                  | 8 kt                                      |
| Tantalum                | Yes                  | Yes                  | Yes                     | Yes                     | High                                         | 99.4 kt                                                        | 0.1 kt                                   | 1.8 kt                                    |
| Titanium                | Yes                  | Yes                  | Yes                     | No                      | High                                         | Ilmenite: 274,000 kt;<br>Rutile: 35,000 kt                     | Ilmenite: 1,100 kt;<br>Rutile: 200 kt    | Ilmenite: 12,000 kt;<br>Rutile: 1,000 kt  |
| Tungsten                | Yes                  | Yes                  | Yes                     | No                      | High                                         | 577 kt                                                         | <1 kt                                    | 84 kt                                     |
| Vanadium                | Yes                  | Yes                  | Yes                     | Yes                     | High                                         | 7,408 kt                                                       | 0                                        | 86 kt                                     |
| Zirconium               | Yes                  | No                   | Yes                     | Yes                     | High                                         | Zircon: 79,300 kt                                              | Zircon: 400 kt                           | Zircon: 2,000 kt                          |

**Table notes**

- <https://www.usgs.gov/news/national-news-release/us-geological-survey-releases-2022-list-critical-minerals>
- <https://rmis.jrc.ec.europa.eu/?page=crm-list-2020-e294f6>
- <https://www.csis.org/analysis/geopolitics-critical-minerals-supply-chains>
- <https://www.ceew.in/publications/critical-non-fuel-mineral-resources-indias-manufacturing-sector>
- <http://pid.geoscience.gov.au/dataset/ga/76526>
- <https://www.ga.gov.au/digital-publication/aimr2021>



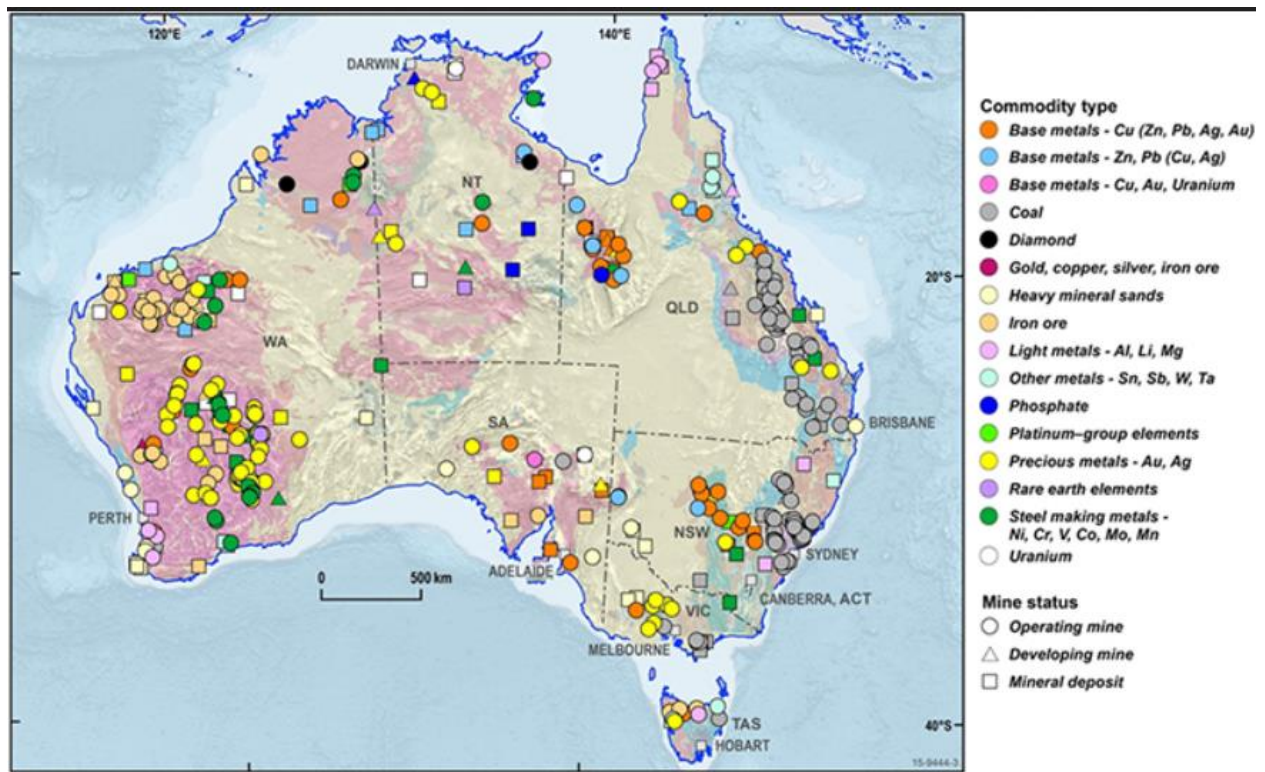

**Figure S7.** Major mining and mineral deposits in Australia (Reproduced from [10]).

## 5. LIB Supply Chain – Battery Recycling

**Table S3.** Notable Players in the U.S. battery Recycling Industry

| Activity                   | Company                             | Facility Location                                                        | Capacity    | Description (ref)                                                                                                                                                                                                                                      |
|----------------------------|-------------------------------------|--------------------------------------------------------------------------|-------------|--------------------------------------------------------------------------------------------------------------------------------------------------------------------------------------------------------------------------------------------------------|
| Remanufacturer /Repurposer | RePurpose Energy                    | Fairfield, California                                                    | N/A         | Repurpose PEV battery for stationary energy storage; 275 kWh demonstration project based on Nissan Leaf battery completed in 2019 [11]                                                                                                                 |
|                            | Spiers New Technologies (Cox)       | Oklahoma City, Oklahoma                                                  | N/A         | Repair, refurbish, remanufacture EV batteries; repurpose EV batteries for non-vehicle applications [12]                                                                                                                                                |
| Preprocessor               | Ascend Elements                     | Covington, Georgia                                                       | 30,000 t/yr | Fully operational in August 2022. Produce battery-grade Li, Co, and Ni salts from EOL batteries and scrap; Can produce black mass to supply its Kentucky facility [13]                                                                                 |
|                            | Li-Cycle                            | Rochester, New York; Gilbert, Arizona; Tuscaloosa, Alabama; Warren, Ohio | 40,000 t/yr | Spokes. Produce black mass from batteries and scrap [14]                                                                                                                                                                                               |
| Recycler                   | American Battery Technology Company | Fernley, Nevada                                                          | 20,000 t/yr | Under construction. Will produce battery-grade materials from EOL batteries via an automated deconstruction process plus hydro [15, 16]                                                                                                                |
|                            | Ascend Elements                     | Hopkinsville, Kentucky                                                   | N/A         | Construction to begin in Q4 2022; Operation to begin in late 2023. Will produce precursor (GA) and cathode active material (KY) from black mass based on the Hydro-to-Cathode technology. Can produce battery materials for 250,000 PEVs per year [17] |
|                            | Cirba Solutions                     | Lancaster, Ohio                                                          | N/A         | Under expansion. Will produce battery-grade critical minerals from batteries. Received \$75 million in funding from the Bipartisan Infrastructure Law. Can produce battery materials for 200,000 EVs per year [18]                                     |
|                            | Li-Cycle                            | Rochester, New York                                                      | 35,000 t/yr | Hub. Commission to begin in 2023. Will produce battery-grade materials, including Li <sub>2</sub> CO <sub>3</sub> from black mass via hydro [14]                                                                                                       |
|                            | Redwood Materials                   | Carson City, Nevada                                                      | N/A         | Under construction. Will produce cathode and anode from batteries and scrap. Can produce materials for 1 million EVs in 2025, 5 million in 2030 [19]                                                                                                   |
| Direct recycler            | Li Industries                       | Blacksburg, Virginia (HQ)                                                | N/A         | Separate and regenerate cathode material from EOL batteries. Plan to build and open a commercial battery sorting and recycling facility in 2023 [20, 21]                                                                                               |
|                            | Princeton NuEnergy                  | Mckinney, Texas                                                          | 500 t/yr    | Reclaim and repair cathode material from batteries and scrap via a low-temperature plasma-assisted process [22]                                                                                                                                        |

## 6. References

1. United States Census Bureau. 2020 Population Distribution in the United States and Puerto Rico. Available online: <https://www.census.gov/library/visualizations/2021/geo/population-distribution-2020.html> (Accessed on 23<sup>rd</sup> September 2023).
2. Frost S. South Australia Library Collection. Archivist: Archival Collections: 20 Years Ahead of its Time - Australia's Own Green Car. Available online: <https://www.slsa.sa.gov.au/20-years-ahead-of-its-time-australias-own-green-car> (Accessed on 23<sup>rd</sup> September 2023)
3. Electric Vehicle Council, State of EVs, October 2022. Available online: <https://electricvehiclecouncil.com.au/wp-content/uploads/2022/10/State-of-EVs-October-2022.pdf> (Accessed on 23<sup>rd</sup> September 2023)
4. Electric Vehicle Council, State of EVs, March 2022. Available online: <https://electricvehiclecouncil.com.au/reports/state-of-electric-vehicles-march-2022/> (Accessed on 23<sup>rd</sup> September 2023)
5. South Australia Turns on Tesla's 100MW Battery: 'History in the Making'. Available online: <https://www.theguardian.com/australia-news/2017/dec/01/south-australia-turns-on-teslas-100mw-battery-history-in-the-making> (Accessed on 23<sup>rd</sup> September 2023)
6. Colthorpe A. Victorian Big Battery: Australia's Biggest Battery Storage System at 450MWh, is Online. Available online: <https://www.energy-storage.news/victorian-big-battery-australias-biggest-battery-storage-system-at-450mwh-is-online/> (Accessed on 23<sup>rd</sup> September 2023)
7. Clean Energy Council, Clean Energy Australia Report 2022. Available online: <https://assets.cleanenergycouncil.org.au/documents/resources/reports/clean-energy-australia/clean-energy-australia-report-2022.pdf> (Accessed on 23<sup>rd</sup> September 2023): Melbourne, Australia
8. Australia Energy Storage Systems (ESS) Market - Growth, Trends, COVID-19 Impact, and Forecasts (2022 - 2027). Available online: <https://www.globenewswire.com/news-release/2022/02/11/2383529/0/en/Australia-Energy-Storage-Systems-ESS-Market-Growth-Trends-COVID-19-Impact-and-Forecasts-2022-2027.html> (Accessed on 23<sup>rd</sup> September 2023): GlobeNewswire
9. Geoscience Australia, Critical Minerals at Geoscience Australia. Available online: <https://www.ga.gov.au/scientific-topics/minerals/critical-minerals> (Accessed on 23<sup>rd</sup> September 2023)
10. Geoscience Australia, Critical Minerals at Geoscience Australia. Available online: <https://www.ga.gov.au/education/classroom-resources/minerals-energy/australian-mineral-facts> (Accessed on 23<sup>rd</sup> September 2023)
11. RePurpose Energy. Available online: <https://www.repurpose.energy> (Accessed on 23<sup>rd</sup> September 2023)
12. Spiers New Technologies. Available online: <https://www.coxautoinc.eu/our-product-brands/spiers-new-technologies/> (Accessed on 23<sup>rd</sup> September 2023)
13. Ascend Elements, Battery Resourcers to Open North America's Largest Lithium-Ion Battery Recycling Facility by August. Available online: <https://ascendelements.com/battery-resourcers-to-open-north-americas-largest-lithium-ion-battery-recycling-facility-by-august/> (Accessed on 23<sup>rd</sup> September 2023)
14. Business Wire, Li-Cycle Opens Lithium-Ion Battery Recycling Facility in Alabama. Available online: <https://www.businesswire.com/news/home/20221013005221/en/Li->

- Cycle-Opens-Lithium-ion-Battery-Recycling-Facility-in-Alabama (Accessed on 23<sup>rd</sup> September 2023)
15. American Battery Technology Company, American Battery Technology Company. Lithium-Ion Battery Recycling. Available online: <https://americanbatterytechnology.com/solutions/lithium-ion-battery-recycling/> (Accessed online 23<sup>rd</sup> September 2023)
  16. American Battery Technology Company, Lithium-ion Battery Recycling Plant. Available online: <https://americanbatterytechnology.com/projects/recycling-plant/> (Accessed on 23<sup>rd</sup> September 2023)
  17. Ascend Elements, Ascend Elements to Invest up to \$1 billion in Southwest Kentucky EV Battery Materials Manufacturing Facility. Available online: <https://ascendelements.com/ascend-elements-apex1/> (Accessed on 23<sup>rd</sup> September 2023)
  18. Cirba Solutions, Cirba Solutions Awarded \$75M in DOE Grant Funding. Available online: <https://www.cirbasolutions.com/cirba-solutions-awarded-75m-in-doe-grant-funding/> (Accessed on 23<sup>rd</sup> September 2023)
  19. Redwood Materials, Recycling, Refining, and Remanufacturing Battery Materials for a Clean Energy Future. Available online: <https://www.redwoodmaterials.com/solutions/> (Accessed on 23<sup>rd</sup> September 2023)
  20. Li Industries, Direct Li-Ion Battery Recycling. Available online: <https://www.li-ind.com/li-industries-direct-li-ion-battery-recycling> (Accessed on 23<sup>rd</sup> September 2023)
  21. Li Industries, Li Industries Announces the Closing of Series A Fundraising. Available online: <https://www.li-ind.com/posts/li-industries-announces-the-closing-of-series-a-fundraising#:~:text=Li%20Industries%2C%20an%20innovative%20and%20fast-growing%20climate%20tech,prominent%20deep-tech%20venture%20capital%20firms%20in%20Silicon%20Valley> (Accessed on 23<sup>rd</sup> September 2023)
  22. PR Newswire, Princeton NuEnergy (PNE) and Wistron GreenTech Announce Grand Opening of Lithium-Ion Battery Recycling Pilot Line in McKinney, Texas. . Available online: <https://www.prnewswire.com/news-releases/princeton-nuenergy-pne-and-wistron-greentech-announce-grand-opening-of-lithium-ion-battery-recycling-pilot-line-in-mckinney-texas-301658191.html> (Accessed on 23<sup>rd</sup> September 2023)
